# Supplementary material for: Selective pressure against horizontally acquired prokaryotic genes as a driving force of plastid evolution
Source: PubMed Central journal article supplement (PMC4707469; doi:10.1038/srep19036), 2016-01-11
Supplement: srep19036-s1.pdf [file srep19036-s1.pdf]

# Selective pressure against horizontally acquired prokaryotic genes as a driving force of plastid evolution

Briardo Llorente<sup>1,2,\*</sup>, Flavio S. J. de Souza<sup>2,+</sup>, Gabriela Soto<sup>2,+</sup>, Cristian Meyer<sup>2</sup>, Guillermo D. Alonso<sup>2,3</sup>, Mirtha M. Flawiá<sup>2,3</sup>, Fernando Bravo-Almonacid<sup>2,4</sup>, Nicolás D. Ayub<sup>5,6</sup> and Manuel Rodríguez-Concepción<sup>1,\*</sup>

<sup>1</sup> Centre for Research in Agricultural Genomics (CRAG) CSIC-IRTA-UAB-UB, 08193 Barcelona, Spain.

<sup>2</sup> Instituto de Investigaciones en Ingeniería Genética y Biología Molecular Dr. Héctor Torres, Consejo Nacional de Investigaciones Científicas y Técnicas (INGEBI-CONICET), C1428ADN Buenos Aires, Argentina.

<sup>3</sup> Departamento de Fisiología, Biología Molecular y Celular, Facultad de Ciencias Exactas y Naturales, Universidad de Buenos Aires, C1428EGA Buenos Aires, Argentina.

<sup>4</sup> Departamento de Ciencia y Tecnología. Universidad Nacional de Quilmes, B1876BXD Bernal, Argentina.

<sup>5</sup> Instituto de Genética Ewald A. Favret, Centro de Investigación en Ciencias Veterinarias y Agronómicas, Instituto Nacional de Tecnología Agropecuaria (CICVyA-INTA), B1712WAA Castelar, Argentina.

<sup>6</sup> Consejo Nacional de Investigaciones Científicas y Técnicas (CONICET), C1033AAJ Buenos Aires, Argentina.

\* Corresponding authors: [briardo.llorente@cragenomica.es](mailto:briardo.llorente@cragenomica.es) or [manuel.rodriguez@cragenomica.es](mailto:manuel.rodriguez@cragenomica.es)

+ These authors contributed equally to this work.





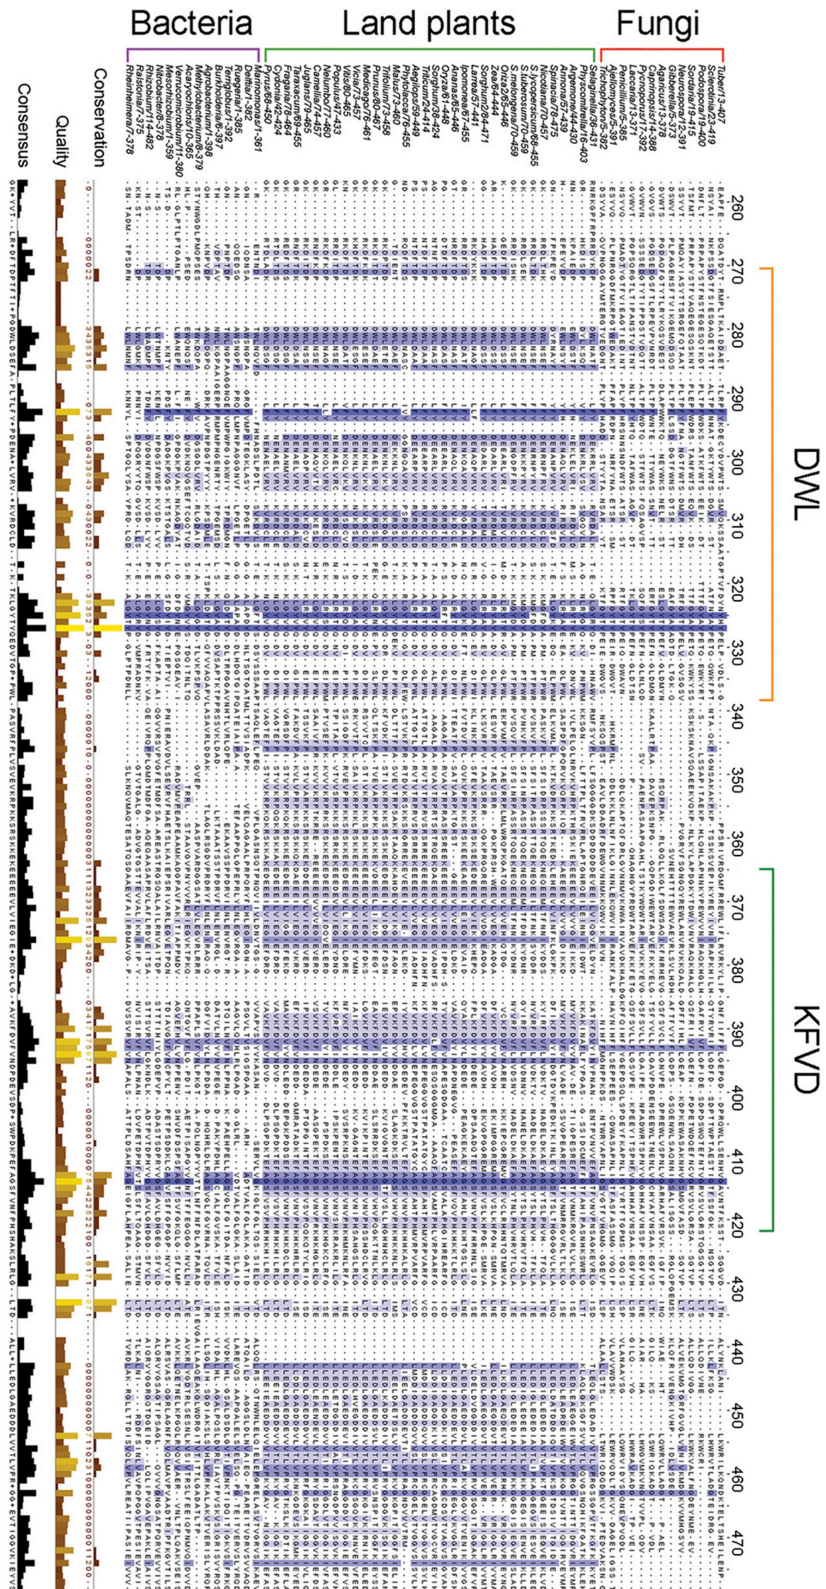

**Figure S1 | Sequence alignments of PPO domains from bacteria, land plants and fungi.** Alignments include the TYR (PFAM00264), DWL (PFAM12142) and KFDV (PFAM12143) domains of PPO. The highly conserved copper-binding motifs A (CuA) and B (CuB) of the TYR domain are also indicated.

**Table S1.** GenBank accession IDs for protein sequences used in Figure 1b.

| <b>Organism</b>                             | <b>Accession number</b> | <b>Phylum</b>   |
|---------------------------------------------|-------------------------|-----------------|
| <i>Acaryochloris marina</i>                 | WP_012167220            | Cyanobacteria   |
| <i>Agaricus bisporum</i>                    | Q00024                  | Basidiomycota   |
| <i>Agrobacterium vitis</i>                  | WP_015916152            | Proteobacteria  |
| <i>Ajellomyces dermatitidis</i> ER-3        | EEQ88565                | Ascomycota      |
| <i>Aphanizomenon flos-aquae</i>             | WP_027401937            | Cyanobacteria   |
| <i>Arthrotrichum oligospora</i> ATCC 24927  | EGX43307                | Ascomycota      |
| <i>Burkholderia thailandensis</i> 1         | WP_015604107            | Proteobacteria  |
| <i>Burkholderia thailandensis</i> 2         | WP_011400974            | Proteobacteria  |
| <i>Candidatus Nitrospira defluvii</i>       | WP_013249721            | Nitrospirae     |
| <i>Chitinimonas koreensis</i>               | WP_028446804            | Proteobacteria  |
| <i>Chlamydomonas reinhardtii</i>            | XP_001701364            | Chlorophyta     |
| <i>Chromobacterium violaceum</i> ATCC 12472 | AAQ60926                | Proteobacteria  |
| <i>Chroococcidiopsis thermalis</i>          | WP_015153379            | Cyanobacteria   |
| <i>Coprinopsis cinerea</i> okayama7#130     | XP_002911630            | Basidiomycota   |
| <i>Delftia acidovorans</i>                  | WP_016447903            | Proteobacteria  |
| <i>Gallaecimonas xiamenensis</i>            | WP_008484930            | Proteobacteria  |
| <i>Fusarium graminearum</i>                 | CEF86307                | Ascomycota      |
| <i>Gloeocapsa</i> sp. PCC 7428              | WP_015187306            | Cyanobacteria   |
| <i>Hahella ganghwensis</i>                  | WP_020405703            | Proteobacteria  |
| <i>Haliscomenobacter hydrossis</i>          | WP_013766505            | Bacteroidetes   |
| <i>Marinomonas mediterranea</i>             | AAV49996                | Proteobacteria  |
| <i>Mesorhizobium</i>                        | WP_013530378            | Proteobacteria  |
| <i>Methylobacterium</i> sp. 4-46            | WP_012335039            | Proteobacteria  |
| <i>Nelumbo nucifera</i>                     | ADC92563                | Streptophyta    |
| <i>Neofusicoccum parvum</i> UCRNP2          | XP_007587508            | Ascomycota      |
| <i>Neurospora crassa</i> OR74A              | XP_964823               | Ascomycota      |
| <i>Nisaea denitrificans</i>                 | WP_028466395            | Proteobacteria  |
| <i>Nitrobacter hamburgensis</i>             | WP_011511370            | Proteobacteria  |
| <i>Nocardiopsis halotolerans</i>            | WP_040684307            | Actinobacteria  |
| <i>Oceanospirillum beijerinckii</i>         | WP_028299139            | Proteobacteria  |
| <i>Oryza sativa</i>                         | ACS15320                | Streptophyta    |
| <i>Physcomitrella patens</i>                | AAX69084                | Streptophyta    |
| <i>Podospira anserina</i> S mat+            | XP_001912783            | Ascomycota      |
| <i>Pseudanabaena</i> sp. PCC 6802           | WP_019501743            | Cyanobacteria   |
| <i>Ralstonia solanacearum</i>               | ACM68954                | Proteobacteria  |
| <i>Rheinheimera</i> sp. A13L                | WP_008899933            | Proteobacteria  |
| <i>Rhizobium etli</i> CFN 42                | AAM54973                | Proteobacteria  |
| <i>Ruegeria pomeroyi</i>                    | WP_011047142            | Proteobacteria  |
| <i>Sagittula stellata</i>                   | WP_005858917            | Proteobacteria  |
| <i>Sclerotinia sclerotiorum</i> 1980 UF-70  | XP_001584564            | Ascomycota      |
| <i>Selaginella moellendorffii</i> 1         | XP_002969567            | Streptophyta    |
| <i>Selaginella moellendorffii</i> 2         | XP_002990879            | Streptophyta    |
| <i>Sinorhizobium meliloti</i>               | WP_017267834            | Proteobacteria  |
| <i>Solanum tuberosum</i>                    | AAA85122                | Streptophyta    |
| <i>Sorangium cellulosum</i>                 | WP_020736163            | Proteobacteria  |
| <i>Sorghum bicolor</i>                      | XP_002446945            | Streptophyta    |
| <i>Talaromyces marneffeii</i> ATCC 18224    | XP_002149601            | Ascomycota      |
| <i>Terriglobus saanensis</i>                | WP_013568839            | Acidobacteria   |
| <i>Triticum aestivum</i>                    | AAS00454                | Streptophyta    |
| <i>Tuber magnatum</i>                       | CAT00093                | Ascomycota      |
| <i>Verrucomicrobium spinosum</i>            | WP_009958178            | Verrucomicrobia |
| <i>Vicia faba</i>                           | Q06215                  | Streptophyta    |
| <i>Vitis vinifera</i>                       | NP_001268045            | Streptophyta    |
| <i>Volvox carteri</i>                       | XP_002956492            | Chlorophyta     |

**Table S2.** Primers used in this study.

| <b>Primer name</b>             | <b>Sequence</b>                                           |
|--------------------------------|-----------------------------------------------------------|
| StPPO <sub>M</sub> F (C)       | GGGGACAAGTTTGTACAAAAAAGCAGGCTATGGCAAGCTTGTGCAATAGTAGTAG   |
| StPPO <sub>A</sub> F (C)       | GGGGACAAGTTTGTACAAAAAAGCAGGCTATGGACCAAACCAAACGTTGAAAC     |
| StPPO R (C)                    | GGGGACCACTTTGTACAAGAAAGCTGGGTTTAAACAATCTGCAAGACTGATCGTCG  |
| StPPO C-tag R (C)              | GGGGACCACTTTGTACAAGAAAGCTGGGTTTACAATCTGCAAGACTGATCGTCG    |
| StPPO <sub>M</sub> N-tag F (C) | GGGGACAAGTTTGTACAAAAAAGCAGGCTTCATGGCAAGCTTGTGCAATAGTAGTAG |
| StPPO <sub>A</sub> N-tag F (C) | GGGGACAAGTTTGTACAAAAAAGCAGGCTTCATGGACCAAACCAAACGTTGAAAC   |
| StPPO qPCR F (Q)               | TGAATGCGAATGAGCTTGAC                                      |
| StPPO qPCR R (Q)               | CAGCTGGAAATCAACAGTCG                                      |
| AtUBC qPCR F (Q)               | TCAAATGGACCGCTCTTATC                                      |
| AtUBC qPCR R (Q)               | CACAGACTGAAGCGTCCAAG                                      |

The names are labelled with (C) or (Q) to indicate whether they were used for cloning or qPCR, respectively.
